# Supplementary material
Source: Springer Nature journal article supplement (https://www.springermedizin.de/resource/supplementary/12889_2012_5427_MOESM2_ESM.pdf/9495292)
Supplement: MOESM2 [file 9495292]

Total tested  
n = 2,263,869

**Excluded**

Military: n = 33,771  
Prisons: n = 32,014  
Clinical: n = 9,369  
Contact: n = 18,804  
Unknown/equivocal result: n = 0

Positivity analysis  
n = 2,169,911

**Excluded**

Sex unknown: n = 6491  
Ethnicity unknown: n = 560,134  
SHA unknown: n = 48,147

Coverage analysis  
n = 1,555,139
